# Supplementary material for: Short Leukocyte Telomere Length Precedes Clinical Expression of Atherosclerosis: The Blood-and-Muscle Model
Source: PubMed Central journal article supplement — Circ Res. 2017 Dec 14;122(4):616–23. doi: 10.1161/CIRCRESAHA.117.311751 (PMC5821479; doi:10.1161/circresaha.117.311751), 2017-12-14
Supplement: res-122-616-s001.pdf [file res-122-616-s001.pdf]

## SUPPLEMENTAL MATERIAL

**Online Figure I:** Flow chart of the participants in the TELARTA project (Discovery Cohort).

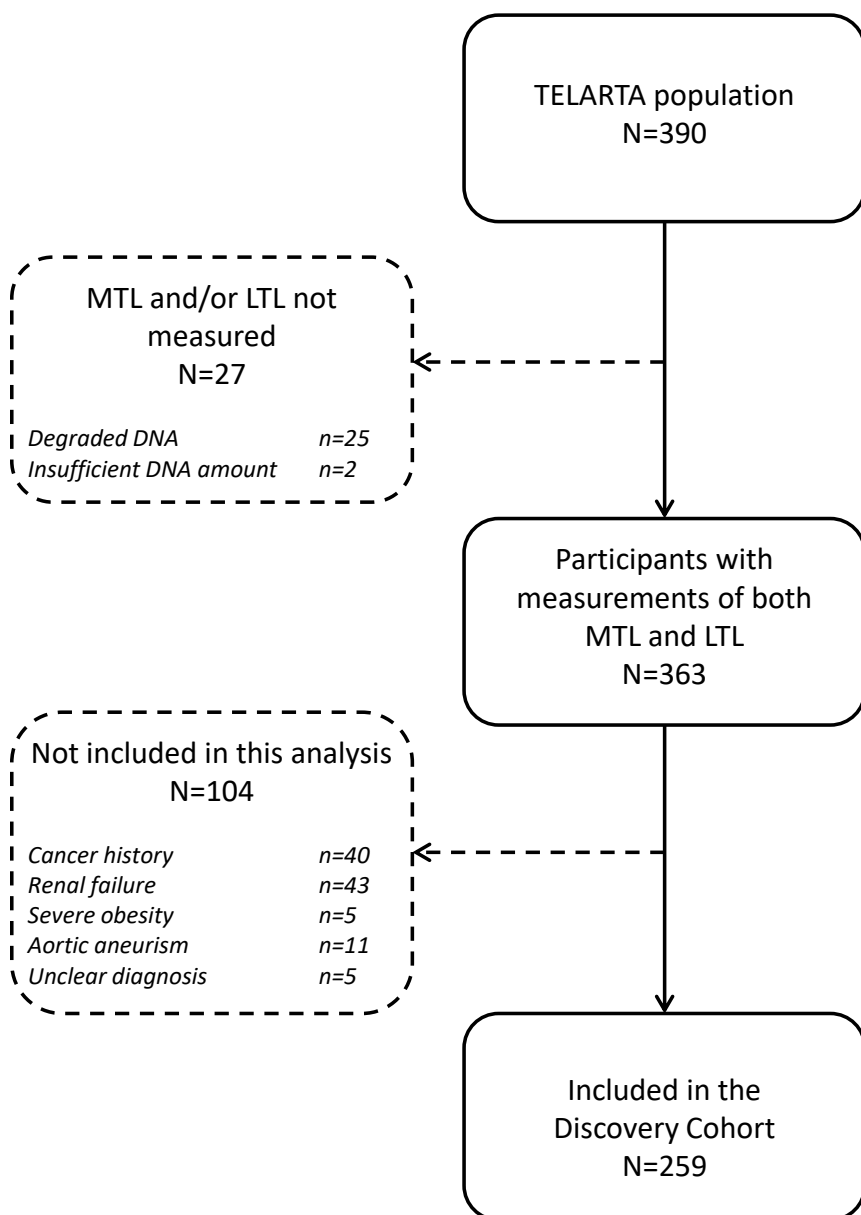

**Online Figure II:** Flow chart of the participants of the Replication Cohort.

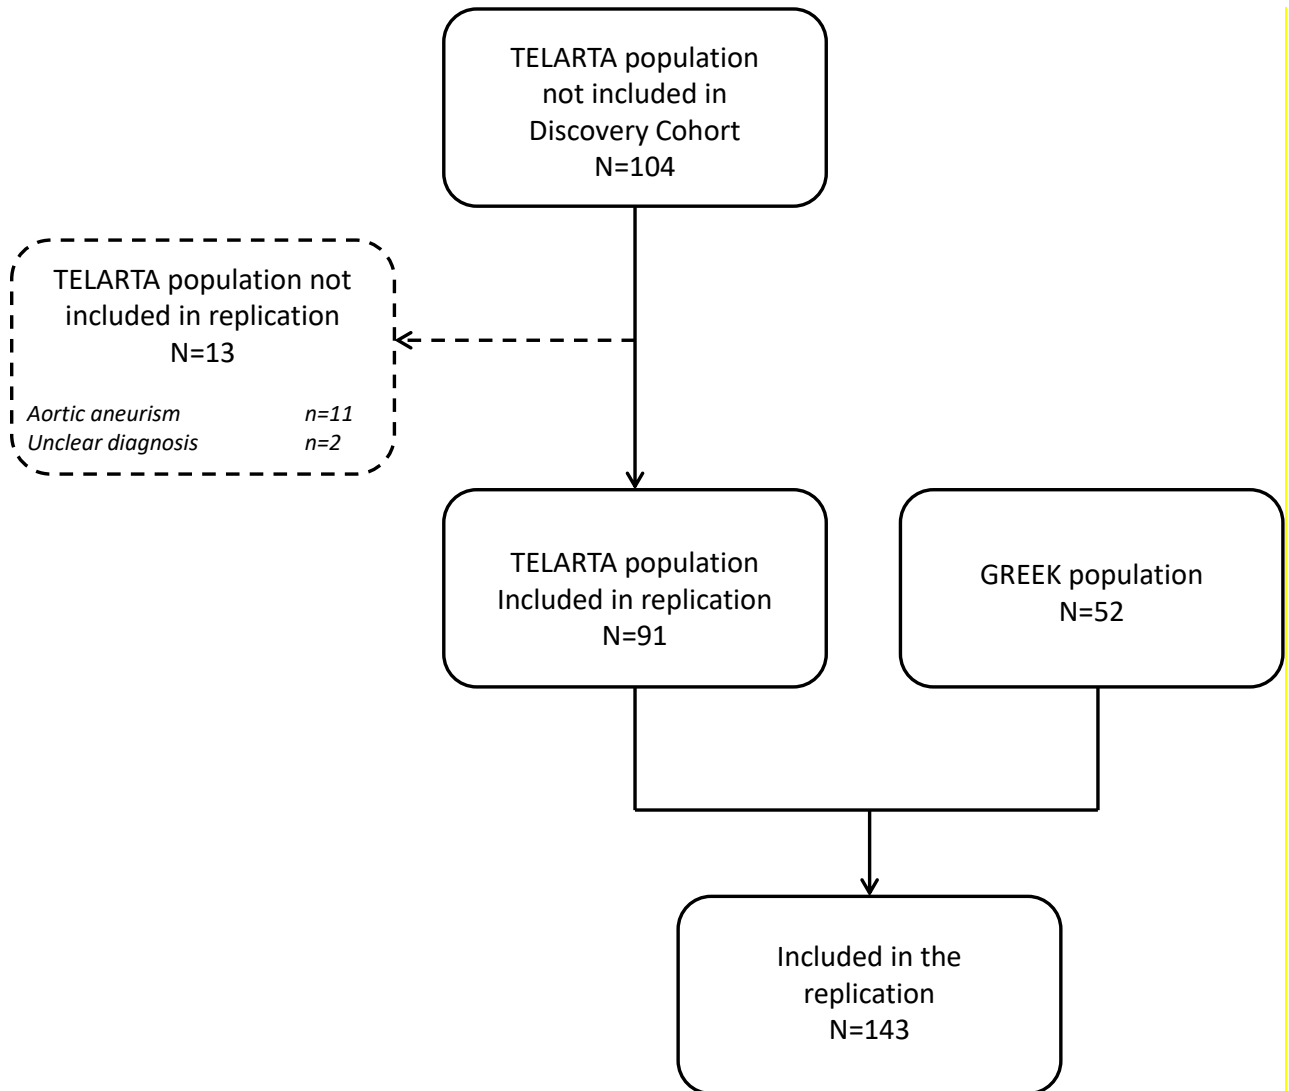

**Online Figure III:** Leukocyte telomere length and site-adjusted muscle telomere length versus age in the Discovery Cohort.

LTL= leukocyte telomere length;  $MTL_A$ = site-adjusted muscle telomere length adjusted for biopsy site.

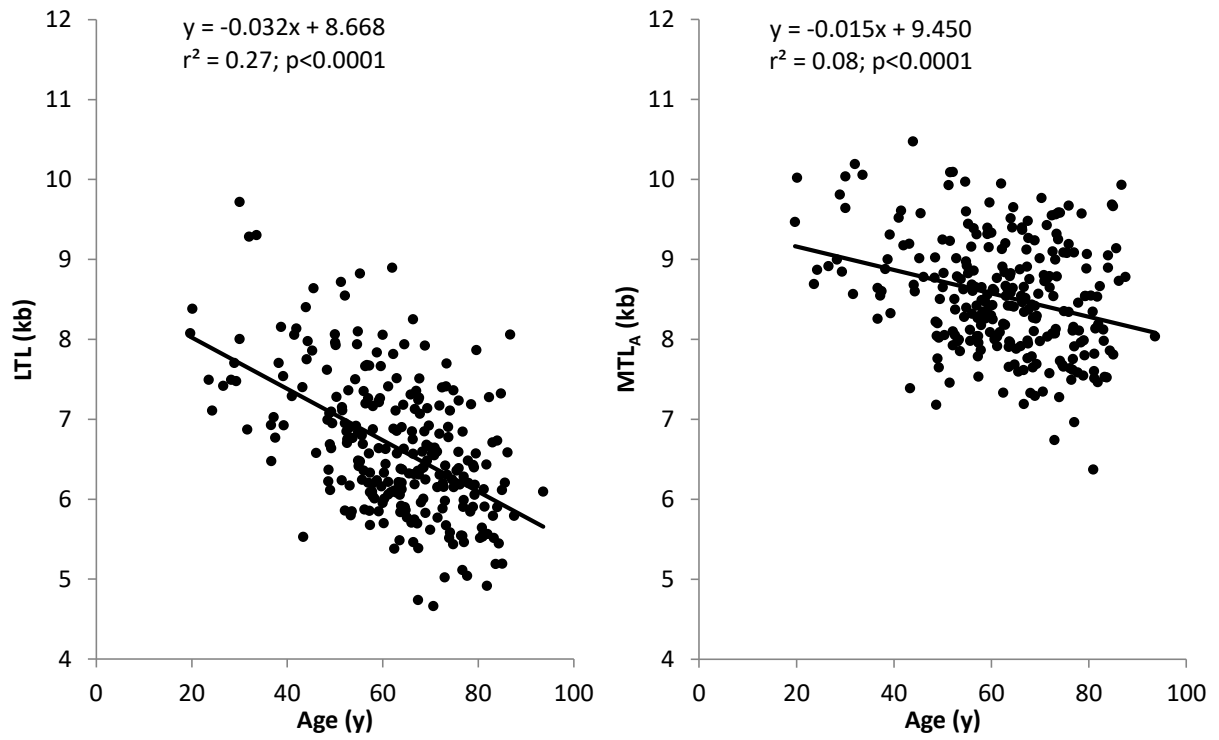

**Online Figure IV:** The four telomere length models in men and women of the Discovery Cohort.

LTL= leukocyte telomere length;  $MTL_A$ = site-adjusted muscle telomere length; ASCVD = atherosclerotic cardiovascular disease. Values are adjusted for age. Mean  $\pm$  SEM.

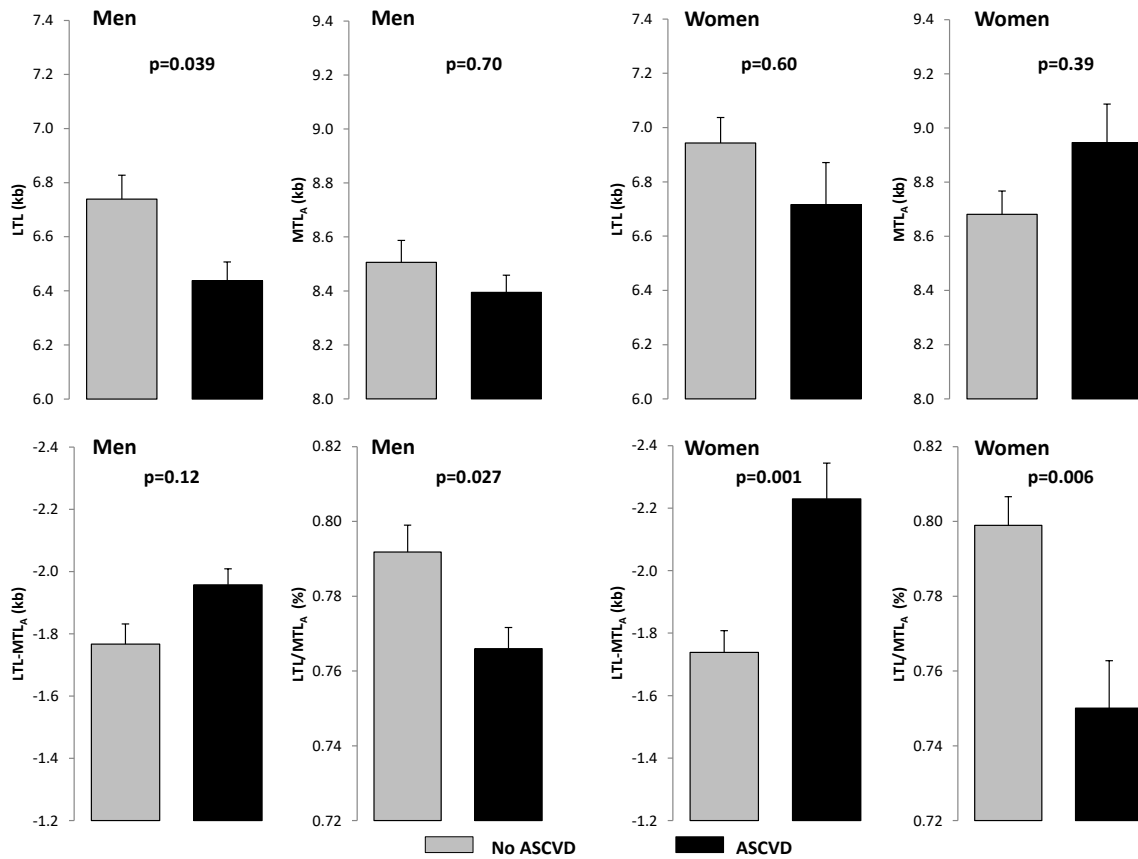

**Online Figure V:** The four telomere length models versus the number of atherosclerotic sites in the men and women of the Discovery Cohort.

0 = Control; 1, one site;  $\geq 2$ , two or more sites. Values are adjusted for age. Mean  $\pm$  SEM.

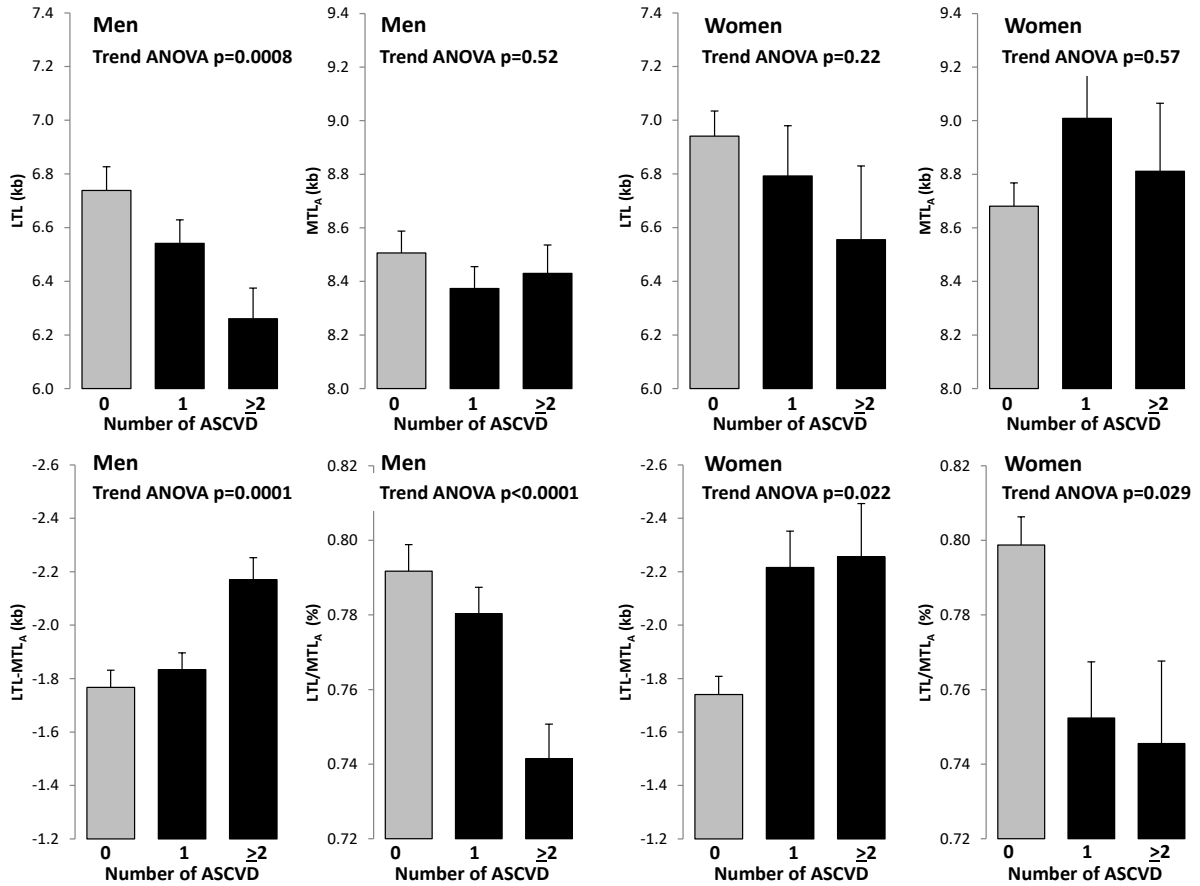

**Online Figure VI:** The four telomere length models in the subjects of the Replication Cohort with and without atherosclerotic cardiovascular disease (ASCVD).

LTL= leukocyte telomere length; MTL= muscle telomere length; ACVD = atherosclerotic cardiovascular disease. Age and sex adjusted values. Mean  $\pm$  SEM.

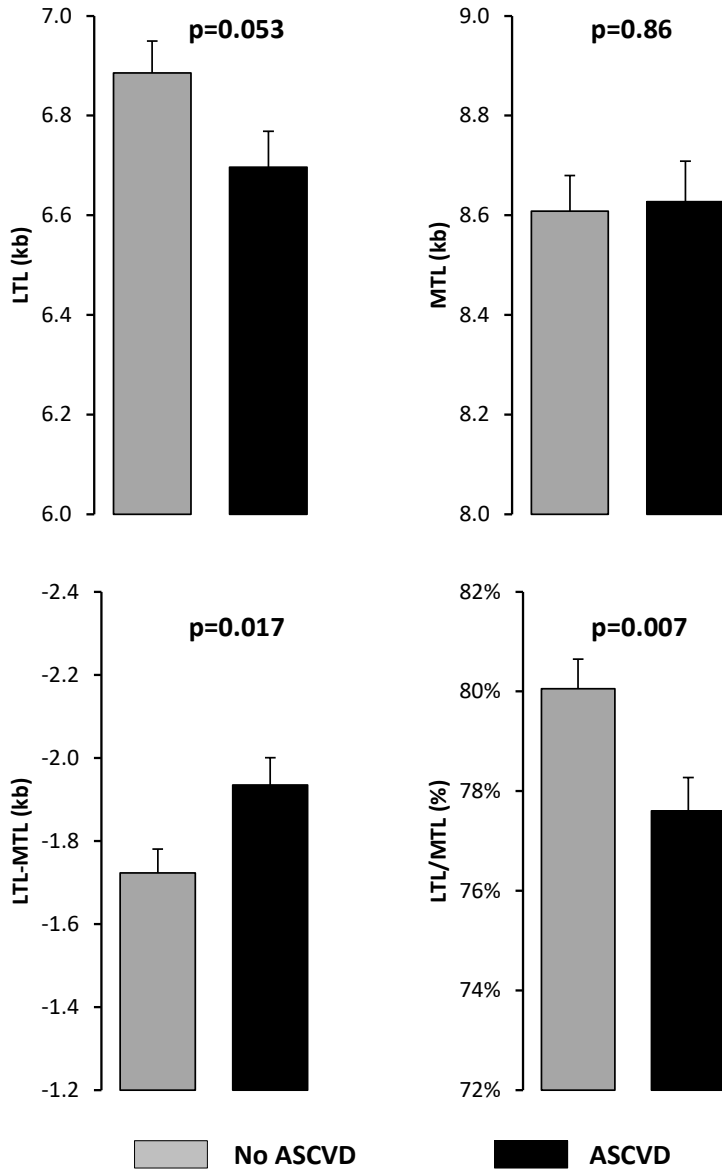

**Online Table I.** Muscle telomere length (kb) in different biopsy sites in the Discovery Cohort.

---

| <b>Muscle tissue source</b> | <b>N</b> | <b>Least square mean</b> | <b>SE</b> |
|-----------------------------|----------|--------------------------|-----------|
| Head & neck                 | 35       | 8.412                    | 0.117     |
| Legs distal                 | 11       | 8.244                    | 0.206     |
| Legs proximal               | 76       | 8.414                    | 0.078     |
| Abdominal and back          | 67       | 8.551                    | 0.084     |
| Pelvic cavity               | 20       | 8.574                    | 0.152     |
| Thorax                      | 50       | 8.849                    | 0.096     |

---

Least square mean estimates are from model with age, sex and biopsy site. Weighted mean muscle telomere length was 8.50 kb. Muscle telomere length varied significantly between tissues (**Online Table IIb**).

---

**Online Table II.** Age and sex effects on leukocyte telomere length (A) and muscle telomere length (B), and comparisons of TL attrition rates between leukocyte telomere length and muscle telomere length in a mixed model (C) in the Discovery Cohort.

| <b>A. LTL</b> |                 |           |          |           |                     |
|---------------|-----------------|-----------|----------|-----------|---------------------|
|               | <b>Estimate</b> | <b>SE</b> | <b>F</b> | <b>df</b> | <b>p (&gt;  t )</b> |
| Intercept     | 8.746           | 0.208     |          |           |                     |
| Age (y)       | -0.030          | 0.0033    | 82.7     | 1,256     | <0.0001             |
| Sex           | -0.312          | 0.101     | 9.59     | 1,256     | 0.0022              |
| <b>B. MTL</b> |                 |           |          |           |                     |
|               | <b>Estimate</b> | <b>SE</b> | <b>F</b> | <b>df</b> | <b>p (&gt;  t )</b> |
| Intercept     | 9.49            | 0.203     |          |           |                     |
| Age (y)       | -0.0124         | 0.0031    | 15.53    | 1,251     | <0.0001             |
| Sex           | -0.317          | 0.0935    | 11.48    | 5,251     | 0.0008              |
| Biopsy site   |                 |           | 3.32     | 5,251     | 0.0063              |
| <b>C*. TL</b> |                 |           |          |           |                     |
|               | <b>Estimate</b> | <b>SE</b> | <b>F</b> | <b>df</b> | <b>p (&gt;  t )</b> |
| Intercept     | 8.746           | 0.202     |          |           |                     |
| Age (y)       | -0.030          | 0.0032    | 88.31    | 1,337.1   | <0.0001             |
| Sex           | -0.312          | 0.090     | 11.92    | 1,256     | 0.0006              |
| Tissue        | 0.794           | 0.153     | 26.90    | 1,257     | <0.0001             |
| Tissue x Age  | 0.0174          | 0.0024    | 52.93    | 1,257     | <0.0001             |

LTL:  $r^2 = 0.299$ . MTL:  $r^2 = 0.177$ .

C: Comparison of shortening rate between LTL and MTL using a mixed model with ‘individual’ as random effect. Coding of sex: women = 0, men = 1. Coding of tissue type: leukocytes = 0, muscle = 1.

LTL= leukocyte telomere length; MTL = muscle telomere length; df = degrees of freedom; SE = standard error; N = 271 individuals.

\*Instead of defining tissue as a binary variable (leukocytes/muscle), the model can be extended by defining tissue as a factor with seven levels (six muscle types plus leukocytes). However, this model fitted markedly less well (current model: AIC=984; extended model: AIC=1046).



**Online Table III.** Odds ratios for atherosclerotic cardiovascular disease as the best model in Table 2 adjusted for potentially confounding variables (*italics*) in the Discovery Cohort.

| Variable            | Odd's ratio | 95% confidence interval |             | p       |
|---------------------|-------------|-------------------------|-------------|---------|
|                     |             | lower limit             | upper limit |         |
| TL (Z-score)        | 0.571       | 0.383                   | 0.833       | 0.0035  |
| Age (years)         | 1.212       | 0.969                   | 1.606       | 0.0988  |
| Age squared         | 0.999       | 0.998                   | 1.000       | 0.1588  |
| Sex                 | 2.834       | 1.359                   | 6.067       | 0.0053  |
| <i>Ever smoking</i> | 5.148       | 2.608                   | 10.544      | <0.0001 |
| <i>Hypertension</i> | 2.587       | 1.269                   | 5.384       | 0.0088  |
| <i>Diabetes</i>     | 2.418       | 0.916                   | 6.678       | 0.0749  |
| <i>Dyslipidemia</i> | 3.101       | 1.283                   | 7.987       | 0.0115  |
| <i>BMI</i>          | 0.868       | 0.794                   | 0.944       | 0.0007  |

TL (LTL/MTL<sub>A</sub>) was transformed to Z-scores. Coding of sex: women = 0, men = 1.

P-values based on likelihood-ratio tests.

LTL = leukocyte telomere length; MTL<sub>A</sub> = muscle telomere length adjusted for muscle biopsy site; BMI = body mass index.

**Online Table IV:** The four telomere length models in age- and sex- matched pairs (N=79) with and without atherosclerotic cardiovascular disease (in the Discovery Cohort).

|                 | <b>Age<br/>(years)</b> | <b>LTL<br/>(kb)</b> | <b>MTL<sub>A</sub><br/>(kb)</b> | <b>LTL-MTL<sub>A</sub><br/>(kb)</b> | <b>LTL/MTL<sub>A</sub><br/>(%)</b> |
|-----------------|------------------------|---------------------|---------------------------------|-------------------------------------|------------------------------------|
| Control         | 64.5 ± 10.2            | 6.69 ± 0.68         | 8.48 ± 0.62                     | -1.79 ± 0.51                        | 78.9 ± 5.8                         |
| ASCVD           | 64.6 ± 10.1            | 6.42 ± 0.84         | 8.42 ± 0.75                     | -2.00 ± 0.67                        | 76.3 ± 7.4                         |
| ASCVD-Controls* | 0.10 ± 0.73            | -0.28 ± 1.06        | -0.06 ± 1.03                    | -0.21 ± 0.81                        | -2.7 ± 9.0                         |
| Paired t-test   | p = 0.21               | p = 0.023           | p = 0.59                        | p = 0.022                           | p = 0.0097                         |

LTL = leukocyte telomere length; MTL<sub>A</sub> = muscle telomere length adjusted for muscle biopsy site;  
ASCVD = atherosclerotic cardiovascular disease.  
\*Mean of intra-pair differences

**Online Table V:** Odds ratios for men (A) and women (B) for atherosclerotic cardiovascular disease, age in the four telomere length models in the Discovery Cohort.

**A. Men in Discovery Cohort (n=177).**

| Variable                                 | <b>LTL</b>                          | <b>MTL<sub>A</sub></b>              | <b>LTL-MTL<sub>A</sub></b>          | <b>LTL/MTL<sub>A</sub></b>          |
|------------------------------------------|-------------------------------------|-------------------------------------|-------------------------------------|-------------------------------------|
|                                          | OR                                  | OR                                  | OR                                  | OR                                  |
|                                          | 95% CI                              | 95% CI                              | 95% CI                              | 95% CI                              |
|                                          | <b>p</b>                            | <b>p</b>                            | <b>p</b>                            | <b>p</b>                            |
| TL (Z-scores)                            | <b>0.60</b><br>0.40, 0.88<br>0.0091 | <b>0.83</b><br>0.58, 1.16<br>0.27   | <b>0.76</b><br>0.53, 1.08<br>0.1332 | <b>0.68</b><br>0.47, 0.97<br>0.0338 |
| Age (years)                              | <b>1.32</b><br>1.05, 1.75<br>0.016  | <b>1.34</b><br>1.07, 1.78<br>0.0086 | <b>1.19</b><br>0.98, 1.51<br>0.0116 | <b>1.30</b><br>1.05, 1.72<br>0.0141 |
| Age squared<br>(years <sup>2</sup> /100) | <b>0.83</b><br>0.66, 0.99<br>0.034  | <b>0.82</b><br>0.66, 0.98<br>0.0276 | <b>0.83</b><br>0.67, 0.99<br>0.0325 | <b>0.83</b><br>0.68, 0.99<br>0.0338 |
| AICc                                     | <b>221.59</b>                       | <b>227.19</b>                       | <b>226.14</b>                       | <b>223.89</b>                       |
| ΔAICc                                    | <b>0</b>                            | <b>5.60</b>                         | <b>4.55</b>                         | <b>2.30</b>                         |

TL = telomere length; LTL = leukocyte telomere length; MTL<sub>A</sub> = muscle telomere length adjusted for muscle biopsy site; ASCVD = atherosclerotic cardiovascular disease; OR = odds ratio; CI = confidence interval.

TLs were transformed to Z-scores. Age squared was divided by 100 to yield more informative estimates.

The best fitting model is indicated in bold. p-values based on likelihood-ratio tests. AICc represents Akaike's Information Criterion with a correction for finite sample sizes,<sup>19</sup> while ΔAICc is relative to the best model (in bold).

**B. Women in Discovery Cohort (n=83).**

| Variable                                 | <b>LTL</b>                   | <b>MTL<sub>A</sub></b>       | <b>LTL-MTL<sub>A</sub></b>   | <b>LTL/MTL<sub>A</sub></b>   |
|------------------------------------------|------------------------------|------------------------------|------------------------------|------------------------------|
|                                          | OR                           | OR                           | OR                           | OR                           |
|                                          | 95% CI                       | 95% CI                       | 95% CI                       | 95% CI                       |
|                                          | p                            | p                            | p                            | p                            |
| TL (Z-scores)                            | 0.75<br>0.36, 1.46<br>0.399  | 1.74<br>0.98, 3.21<br>0.059  | 0.42<br>0.20, 0.79<br>0.0006 | 0.39<br>0.18, 0.79<br>0.0075 |
| Age (years)                              | 1.33<br>0.96, 2.13<br>0.0923 | 1.50<br>1.04, 2.51<br>0.0243 | 1.39<br>0.99, 2.27<br>0.0556 | 1.35<br>0.98, 2.18<br>0.0736 |
| Age squared<br>(years <sup>2</sup> /100) | 0.82<br>0.58, 1.06<br>0.1554 | 0.76<br>0.51, 1.13<br>0.24   | 0.78<br>0.54, 1.03<br>0.0823 | 0.80<br>0.98, 1.04<br>0.0984 |
| AICc                                     | 93.90                        | 91.06                        | 87.06                        | 87.46                        |
| ΔAICc                                    | 6.84                         | 4.00                         | 0                            | 0.40                         |

TL = telomere length; LTL = leukocyte telomere length; MTL<sub>A</sub> = muscle telomere length adjusted for muscle biopsy site; ASCVD = atherosclerotic cardiovascular disease; OR = odds ratio; CI = confidence interval.

TLs were transformed to Z-scores. Age squared was divided by 100 to yield more informative estimates.

The best fitting model is indicated in bold. p-values based on likelihood-ratio tests. AICc represents Akaike's Information Criterion with a correction for finite sample sizes,<sup>19</sup> while ΔAICc is relative to the best model (in bold).

**Online Table VI: Main characteristics of the Replication Cohort**

| <b>Parameter</b>         | <b>All</b>  | <b>Control</b> | <b>ASCVD</b> |
|--------------------------|-------------|----------------|--------------|
| Number (W/M)             | 143 (46/97) | 80 (37/43)     | 63 (9/54)    |
| Women (%)                | 32          | 46             | 14***        |
| French/Greek (number)    | 91/52       | 50/30          | 41/22        |
| Age (years)              | 56 ± 17     | 50 ± 17        | 65 ± 11***   |
| Hypertension (%) †       | 49          | 41             | 59*          |
| Diabetes (%) †           | 24          | 12             | 38***        |
| Dyslipidemia †           | 24          | 16             | 33*          |
| Smoking (%) §            | 49          | 39             | 60*          |
| BMI (kg/m <sup>2</sup> ) | 30.8 ± 10.1 | 32.2 ± 11.4    | 29.1 ± 7.9   |
| Severe Obesity (%)       | 20          | 30             | 8**          |
| Renal failure (%)        | 31          | 31             | 32           |
| Cancer (%)               | 28          | 30             | 25           |

ASCVD: atherosclerotic cardiovascular disease; BMI : body mass index.

Data are expressed as mean ± SD; % or number.

\*p < 0.05; \*\* p<0.01; \*\*\* p < 0.001 for ASCVD vs. No ASCVD.

† history of or specific treatment for this risk factor; § current and ex-smokers.

Severe Obesity: BMI > 40 kg/m<sup>2</sup>; Renal failure: glomerular filtration < 30 ml/min/1,73m<sup>2</sup>;

Cancer: active malignancy or history of chemotherapy/radiotherapy for cancer.

**Online Table VII:** Odds ratios for atherosclerotic cardiovascular disease, age and sex in the four telomere length models in the Replication Cohort.

| Variable                                 | LTL                                 | MTL                         | LTL-MTL                      | LTL/MTL                      |
|------------------------------------------|-------------------------------------|-----------------------------|------------------------------|------------------------------|
|                                          | OR<br>95% CI<br>p                   | OR<br>95% CI<br>p           | OR<br>95% CI<br>p            | OR<br>95% CI<br>p            |
| TL (Z-scores)                            | <b>0.58</b><br>0.36, 0.91<br>0.0172 | 1.03<br>0.72, 1.47<br>0.88  | 0.60<br>0.40, 0.88<br>0.0088 | 0.56<br>0.36, 0.84<br>0.0042 |
| Age (years)                              | 1.21<br>1.01, 1.39<br>0.057         | 1.19<br>0.99, 1.50<br>0.067 | 1.19<br>0.98, 1.51<br>0.081  | 1.20<br>0.98, 1.51<br>0.077  |
| Age squared (years <sup>2</sup><br>/100) | 0.88<br>0.72, 1.04<br>0.146         | 0.90<br>0.75, 1.07<br>0.24  | 0.90<br>0.74, 1.06<br>0.22   | 0.89<br>0.73, 1.06<br>0.19   |
| Sex                                      | 2.69<br>1.16, 6.70<br>0.021         | 2.63<br>1.14, 6.51<br>0.023 | 3.20<br>1.34, 8.23<br>0.0081 | 3.13<br>1.32, 8.02<br>0.0088 |
| AICc                                     | 204.44                              | 210.09                      | 203.24                       | 201.90                       |
| $\Delta$ AICc                            | 2.55                                | 8.19                        | 1.35                         | 0                            |

TL = telomere length; LTL = leukocyte telomere length; MTL = muscle telomere length; OR = odds ratio; CI = confidence interval.

TLs were transformed to Z-scores. Age squared was divided by 100 to yield more informative estimates. Coding of sex: women = 0, men = 1.

The best fitting model is indicated in bold. p-values based on likelihood-ratio tests. AICc represents Akaike's Information Criterion with a correction for finite sample sizes,<sup>19</sup> while  $\Delta$ AICc is relative to the best model (in bold).
